# Supplementary material for: High fidelity simulation to assess task load index and performance: a prospective observational study
Source: Research Square preprint supplement (doi:10.21203/rs.3.rs-236458/v1), 2021-02-25
Supplement: Supplementary file 2 [file 28e667ac2cf01254d0c6cede.docx]

**High fidelity simulation to assess task load index and performance: a prospective observational study**

Jérémy Favre-Félix1,2, Mikhail Dziadzko2, Christian Bauer1,2, Antoine Duclos3,4, Jean-Jacques Lehot1,4,5, Thomas Rimmelé1,6, Marc. Lilot1,4,7

1 Université Claude Bernard Lyon 1, Centre Lyonnais d’Enseignement par Simulation en Santé, SAMSEI, Lyon, France

2 Hospices Civils de Lyon, Hôpital de la Croix Rousse, Service d’Anesthésie-Réanimation, Lyon, France

3 Hospices Civils de Lyon, Health Data Department, Université Claude Bernard Lyon 1, France

4 Université Claude Bernard Lyon 1, Research on Healthcare Performance (RESHAPE), INSERM U1290, Lyon, France

5 Hospices Civils de Lyon, Hôpital Pierre Wertheimer, Département d’anesthésie-réanimation, Lyon, France

6 Hospices Civils de Lyon, Hôpital Edouard Herriot, Département d’anesthésie-réanimation. EA 7426 “Pathophysiology of Injury Induced Immunosuppression”, Université Claude Bernard Lyon 1-Biomérieux- Hospices Civils de Lyon, Lyon, France

7 Hospices Civils de Lyon, Hôpital Femme Mère Enfant, Département d’anesthésie, Lyon, France

***Correspondance to:** Dr Marc Lilot, département d’anesthésie, Hôpital Femme Mère Enfant, Hospices Civils de Lyon, 59 Boulevard Pinel, 69500 Bron, France. Phone: +33651806521, Fax: + 33427869265. [marclilot@hotmail.com](mailto:marclilot@hotmail.com)
